# Supplementary material
Source: PubMed Central journal article supplement (PMC3866904)
Supplement: NIHMS504064-supplement-11270_2013_1630_MOESM1_ESM.pdf [file NIHMS504064-supplement-11270_2013_1630_MOESM1_ESM.pdf]

## Supplemental materials

**Table S1.** Summary of experimental design.

| <i>Experiment 1: Stability during conditioning of filters</i> |                     |                     |  |  |
|---------------------------------------------------------------|---------------------|---------------------|--|--|
| Filter ID <sup>a</sup>                                        | Spiked <sup>b</sup> | Conditioning<br>(h) |  |  |
| S1a, S1b                                                      | Yes                 | 0                   |  |  |
| S1c, S1d                                                      | Yes                 | 24                  |  |  |
| S4a, S4b                                                      | No                  | 0                   |  |  |
| S4c, S4d                                                      | No                  | 24                  |  |  |
| B1a, B1b                                                      | No                  | 0                   |  |  |
| B1c, B1d                                                      | No                  | 24                  |  |  |

  

| <i>Experiment 2: Stability during storage of filters</i> |                     |                     |                          |  |
|----------------------------------------------------------|---------------------|---------------------|--------------------------|--|
| Filter ID                                                | Spiked <sup>b</sup> | Conditioning<br>(h) | Storage of filter<br>(d) |  |
| S2a, S2b                                                 | Yes                 | 24                  | 0                        |  |
| S2c, S2d, S3a, S3b                                       | Yes                 | 24                  | 7                        |  |
| S3c, S3d                                                 | Yes                 | 24                  | 30                       |  |
| S5a, S5b                                                 | No                  | 24                  | 0                        |  |
| S5c, S5d, S6a, S6b                                       | No                  | 24                  | 7                        |  |
| S6c, S6d                                                 | No                  | 24                  | 30                       |  |
| B2a, B2b                                                 | No                  | 24                  | 0                        |  |
| B2c, B2d, B3a, B3b                                       | No                  | 24                  | 7                        |  |
| B3c, B3d                                                 | No                  | 24                  | 30                       |  |

  

| <i>Experiment 3: Stability during storage of extracts</i> |                     |                   |                        |                         |
|-----------------------------------------------------------|---------------------|-------------------|------------------------|-------------------------|
| Filter ID                                                 | Spiked <sup>b</sup> | Conditioning<br>h | Storage of filter<br>d | Storage of extract<br>m |
| S7-S18, Test #1                                           | No                  | 24                | 0                      | 0                       |
| S7-S18, Test #2                                           | No                  | 24                | 0                      | 1                       |
| S7-S18, Test #3                                           | No                  | 24                | 0                      | 5                       |
| S7-S18, Test #4                                           | No                  | 24                | 0                      | 6                       |

<sup>a</sup>S1a, S1b, S1c and S1d are quarter filters from filter S1. See text for details.

<sup>b</sup>The composition of the spiking solution is shown in Table 1.

**Table S2.** Reproducibility of  $\Sigma$ PAH and  $\Sigma$ NPAH measurements among spiked quarter filters.

| Filter ID <sup>a</sup> | Conditioning<br>(hr) | Storage of filter<br>(day) | $\Sigma$ PAHs                |                                           | $\Sigma$ NPAHs               |                                           |
|------------------------|----------------------|----------------------------|------------------------------|-------------------------------------------|------------------------------|-------------------------------------------|
|                        |                      |                            | Average <sup>b</sup><br>(ng) | Absolute % difference <sup>c</sup><br>(%) | Average <sup>b</sup><br>(ng) | Absolute % difference <sup>c</sup><br>(%) |
| S1a, S1b               | 0                    | 0                          | 59.4                         | 118                                       | 1.78                         | 46.8                                      |
| S1c, S1d               | 24                   | 0                          | 33.6                         | n/a <sup>d</sup>                          | 0.56                         | 84.1                                      |
| S2a, S2b               | 24                   | 0                          | 42.5                         | 7.2                                       | 0.67                         | 1.0                                       |
| S2c, S2d               | 24                   | 7                          | 53.2                         | 20.3                                      | 0.67                         | 1.3                                       |
| S3a, S3b               | 24                   | 7                          | 43.5                         | 7.8                                       | 1.62                         | 1.3                                       |
| S3c, S3d               | 24                   | 30                         | 41.8                         | 10.7                                      | 1.60                         | 1.9                                       |
| Average <sup>e</sup>   |                      |                            |                              | 11.5                                      |                              | 1.4                                       |

<sup>a</sup> IDs are quarter filters.

<sup>b</sup> Average mass  $\Sigma$ PAHs or  $\Sigma$ NPAHs of the two quarter filters.

<sup>c</sup> Calculated as the absolute value of the difference between two quarter filters, divided by the average of these two quarter filters.

<sup>d</sup> Data for sample S1c is missing.

<sup>e</sup> Excludes data for samples S1a, S1b, S1c and S1d

**Table S3.** Average mass of target SVOCs in conditioned and unconditioned quarter filters, and the change in conditioned quarter filters compared to unconditioned ones. Standard deviation in parentheses.

| Group                 | Compound        | Unconditioned<br>(ng) | Conditioned<br>(ng) | Change<br>(%) |
|-----------------------|-----------------|-----------------------|---------------------|---------------|
|                       | Sample size (N) | 2                     | 2                   |               |
| PAHs <sup>a</sup>     | NAP             | 1.16 (0.04)           | 0.84 (0.01)         | -27 (3)       |
|                       | ACY             | 0.06 (0.02)           | 0.04 (0.01)         | -39 (22)      |
|                       | ACT             | 0.09 (0.00)           | 0.09 (0.00)         | -3 (5)        |
|                       | PHE             | 0.02 (0.01)           | 0.02 (0.00)         | -35 (36)      |
|                       | PYR             | 0.46 (0.02)           | 0.33 (0.07)         | -29 (15)      |
|                       | Average         |                       |                     | -27 (20)      |
|                       | Sample size (N) | 2                     | 2                   |               |
| NPAHs <sup>a</sup>    | 2-NNAP          | 0.06 (0.00)           | 0.05 (0.00)         | -14 (4)       |
|                       | 2-NBPH          | 0.09 (0.05)           | 0.08 (0.04)         | -10 (61)      |
|                       | 3-NBPH          | 0.14 (0.05)           | 0.13 (0.04)         | -9 (45)       |
|                       | 4-NBPH          | 0.04 (0.01)           | 0.04 (0.01)         | -13 (31)      |
|                       | 6-NCHR          | 0.72 (0.10)           | 0.73 (0.11)         | 2 (21)        |
|                       | Average         |                       |                     | -9 (38)       |
|                       | Sample size (N) | 4                     | 4                   |               |
| Hopanes <sup>b</sup>  | Hop19           | 0.02 (0.00)           | 0.02 (0.00)         | 7 (27)        |
|                       | Hop15           | 0.02 (0.00)           | 0.03 (0.01)         | 39 (40)       |
|                       | Average         |                       |                     | 23 (34)       |
|                       | Sample size (N) | 4                     | 4                   |               |
| Steranes <sup>b</sup> | Ster42          | 2.29 (0.20)           | 2.34 (0.25)         | 2 (14)        |
|                       | Ster43          | 0.19 (0.03)           | 0.22 (0.04)         | 13 (26)       |
|                       | Average         |                       |                     | 8 (21)        |

<sup>a</sup>Includes only unspiked quarter filters.

<sup>b</sup>Includes both spiked and unspiked quarter filters.

**Table S4.** Mass of PAHs in stored and unstored quarter filters, separated by filter. Data presented are mean (SD).

| Treatment | Compound         | Day 0<br>(ng)    | Day 7-1<br>(ng) | Day 7-2<br>(ng) | Day 30<br>(ng)       | Change (Day7-1 vs. Day0)<br>(%) | Change (Day30 vs. Day7-2)<br>(%) |
|-----------|------------------|------------------|-----------------|-----------------|----------------------|---------------------------------|----------------------------------|
| Unspiked  | Filters involved | S5a, S5b         | S5c, S5d        | S6a, S6b        | S6c, S6d             | S5a, S5b, S5c, S5d              | S6a, S6b, S6c, S6d               |
|           | NAP              | 0.00 (0.00)      | 0.00 (0.00)     | 1.22 (0.00)     | 1.09 (0.15)          | n/a                             | -11 (12)                         |
|           | ACY              | 0.16 (0.04)      | 0.16 (0.03)     | 0.10 (0.00)     | 0.09 (0.00)          | 0 (31)                          | -4 (5)                           |
|           | ACT              | 0.15 (0.02)      | 0.14 (0.03)     | 0.08 (0.02)     | 0.08 (0.02)          | -6 (23)                         | -1 (31)                          |
|           | PHE              | 0.00 (0.00)      | 0.00 (0.00)     | 0.02 (0.00)     | 0.02 (0.00)          | n/a                             | 0 (1)                            |
|           | PYR              | 0.21 (0.03)      | 0.20 (0.03)     | 0.37 (0.02)     | 0.34 (0.01)          | -2 (21)                         | -7 (6)                           |
|           | BBF              | 0.47 (0.08)      | 0.55 (0.19)     | 0.00 (0.00)     | 0.00 (0.00)          | 17 (44)                         | n/a                              |
|           | BAP              | 0.16 (0.04)      | 0.16 (0.03)     | 0.00 (0.00)     | 0.00 (0.00)          | -1 (32)                         | n/a                              |
|           | Average          |                  |                 |                 |                      | 2 (32)                          | -4 (15)                          |
|           | Spiked           | Filters involved | S2a, S2b        | S2c, S2d        | S3a, S3b             | S3c, S3d                        | S2a, S2b, S2c, S2d               |
| NAP       |                  | 1.85 (0.09)      | 1.77 (0.13)     | 1.79 (0.06)     | 1.79 (0.00)          | -4 (8)                          | 0 (3)                            |
| ACY       |                  | 1.20 (0.16)      | 1.20 (1.02)     | 0.24 (0.08)     | 0.23 (0.09)          | 0 (86)                          | -6 (46)                          |
| ACT       |                  | 0.97 (0.23)      | 2.17 (2.45)     | 0.77 (0.01)     | 0.77 (0.02)          | 123 (257)                       | 0 (3)                            |
| PHE       |                  | 2.97 (0.20)      | 3.35 (1.41)     | 2.60 (0.09)     | 2.50 (0.12)          | 12 (48)                         | -4 (6)                           |
| ANT       |                  | 1.91 (0.17)      | 1.95 (1.55)     | 0.30 (0.00)     | 0.30 (0.00)          | 2 (82)                          | -3 (0)                           |
| FLA       |                  | 3.56 (0.33)      | 3.55 (0.68)     | 1.26 (0.06)     | 1.24 (0.14)          | 0 (21)                          | -2 (12)                          |
| PYR       |                  | 3.70 (0.30)      | 3.55 (0.52)     | 3.44 (0.06)     | 3.14 (0.10)          | -10 (16)                        | -9 (3)                           |
| BAA       |                  | 0.00 (0.00)      | 0.00 (0.00)     | 3.00 (0.15)     | 2.92 (0.15)          | n/a                             | -2 (7)                           |
| CHR       |                  | 0.00 (0.00)      | 0.00 (0.00)     | 2.46 (0.18)     | 2.42 (0.18)          | n/a                             | -2 (10)                          |
| BBF       |                  | 10.03 (0.44)     | 15.74 (1.09)    | 5.82 (0.39)     | 5.66 (0.26)          | 57 (13)                         | -3 (8)                           |
| BKF       |                  | 0.00 (0.00)      | 0.00 (0.00)     | 1.10 (0.21)     | 1.18 (0.14)          | n/a                             | 7 (24)                           |
| BAP       |                  | 2.57 (0.30)      | 2.87 (1.06)     | 0.20 (0.01)     | 0.21 (0.00)          | 12 (43)                         | 2 (6)                            |
| IND       |                  | 13.71 (0.14)     | 17.30 (2.25)    | 17.93 (2.41)    | 16.95 (3.02)         | 26 (16)                         | -5 (21)                          |
| DBA       |                  | 0.00 (0.00)      | 0.00 (0.00)     | 2.53 (0.07)     | 2.44 (0.14)          | n/a                             | -4 (6)                           |
| Average   |                  |                  |                 |                 | 11 (46) <sup>a</sup> | -2 (16)                         |                                  |

<sup>a</sup>Excludes ACT.**Table S5.** Mass of NPAHs in stored and unstored quarter filters, separated by filter. Data presented are mean (SD).

| Treatment | Compound         | Day 0<br>(ng) | Day 7-1<br>(ng) | Day 7-2<br>(ng) | Day 30<br>(ng) | Change (Day7-1 vs. Day0)<br>(%) | Change (Day30 vs. Day7-2)<br>(%) |
|-----------|------------------|---------------|-----------------|-----------------|----------------|---------------------------------|----------------------------------|
| Unspiked  | Filters involved | S5a, S5b      | S5c, S5d        | S6a, S6b        | S6c, S6d       | S5a, S5b, S5c, S5d              | S6a, S6b, S6c, S6d               |
|           | 1-NNAP           | 0.109 (0.005) | 0.100 (0.007)   | 0.127 (0.022)   | 0.113 (0.014)  | -8 (8)                          | -11 (19)                         |
|           | 2-NNAP           | 0.103 (0.002) | 0.138 (0.007)   | 0.273 (0.084)   | 0.258 (0.076)  | 34 (8)                          | -5 (40)                          |
|           | 2-NBPH           | 0.138 (0.007) | 0.140 (0.010)   | 0.128 (0.006)   | 0.109 (0.008)  | 1 (9)                           | -15 (7)                          |
|           | 3-NBPH           | 0.575 (0.014) | 0.393 (0.084)   | 0.243 (0.012)   | 0.222 (0.015)  | -32 (15)                        | -9 (8)                           |
|           | 4-NBPH           | 0.189 (0.013) | 0.134 (0.013)   | 0.000 (0.000)   | 0.000 (0.000)  | -29 (8)                         | n/a                              |
|           | 6-NCHR           | 0.808 (0.038) | 0.640 (0.082)   | 0.753 (0.115)   | 0.777 (0.063)  | -21 (11)                        | 3 (18)                           |
|           | Average          |               |                 |                 |                | -9 (10)                         | -7 (20)                          |
| Spiked    | Filters involved | S2a, S2b      | S2c, S2d        | S3a, S3b        | S3c, S3d       | S2a, S2b, S2c, S2d              | S3a, S3b, S3c, S3d               |
|           | 1-NNAP           | 0.017 (0.002) | 0.012 (0.001)   | 0.018 (0.002)   | 0.014 (0.000)  | -30 (9)                         | -25 (8)                          |
|           | 2-NNAP           | 0.076 (0.026) | 0.070 (0.015)   | 0.071 (0.014)   | 0.069 (0.015)  | -9 (37)                         | -2 (29)                          |
|           | 2-NBPH           | 0.273 (0.019) | 0.294 (0.001)   | 0.284 (0.002)   | 0.283 (0.005)  | 8 (8)                           | -1 (2)                           |
|           | 3-NBPH           | 0.112 (0.001) | 0.086 (0.004)   | 0.305 (0.015)   | 0.298 (0.014)  | -23 (4)                         | -2 (7)                           |
|           | 4-NBPH           | 0.028 (0.012) | 0.031 (0.003)   | 0.055 (0.002)   | 0.053 (0.001)  | 10 (49)                         | -4 (4)                           |
|           | 6-NCHR           | 0.072 (0.038) | 0.062 (0.004)   | 0.804 (0.014)   | 0.806 (0.004)  | -14 (46)                        | 0 (2)                            |
|           | Average          |               |                 |                 |                | -10 (32)                        | -6 (13)                          |

**Table S6.** Mass of hopanes and steranes in stored and unstored quarter filters, separated by filter. Data presented are mean (SD).

| Group    | Compound         | Day 0<br>(ng)      | Day 7-1<br>(ng)    | Day 7-2<br>(ng)    | Day 30<br>(ng)     | Change (Day7-1 vs. Day0)<br>(%) | Change (Day30 vs. Day7-2)<br>(%) |
|----------|------------------|--------------------|--------------------|--------------------|--------------------|---------------------------------|----------------------------------|
|          | Filters involved | S2a, S2b, S5a, S5b | S2c, S2d, S5c, S5d | S3a, S3b, S6a, S6b | S3c, S3d, S6c, S6d |                                 |                                  |
| Hopanes  | Hop19            | 0.01 (0.00)        | 0.01 (0.00)        | 0.02 (0.00)        | 0.01 (0.00)        | -2 (14)                         | -13 (16)                         |
|          | Hop15            | 0.02 (0.00)        | 0.01 (0.00)        | 0.01 (0.00)        | 0.02 (0.00)        | -22 (21)                        | 25 (27)                          |
|          | Average          |                    |                    |                    |                    | -12 (18)                        | 6 (22)                           |
| Steranes | Ster42           | 2.03 (0.07)        | 1.87 (0.21)        | 1.75 (0.17)        | 1.84 (0.06)        | -8 (11)                         | 5 (11)                           |
|          | Ster43           | 0.18 (0.00)        | 0.17 (0.02)        | 0.16 (0.02)        | 0.16 (0.02)        | -9 (13)                         | 1 (18)                           |
|          | Average          |                    |                    |                    |                    | -8 (12)                         | 3 (15)                           |

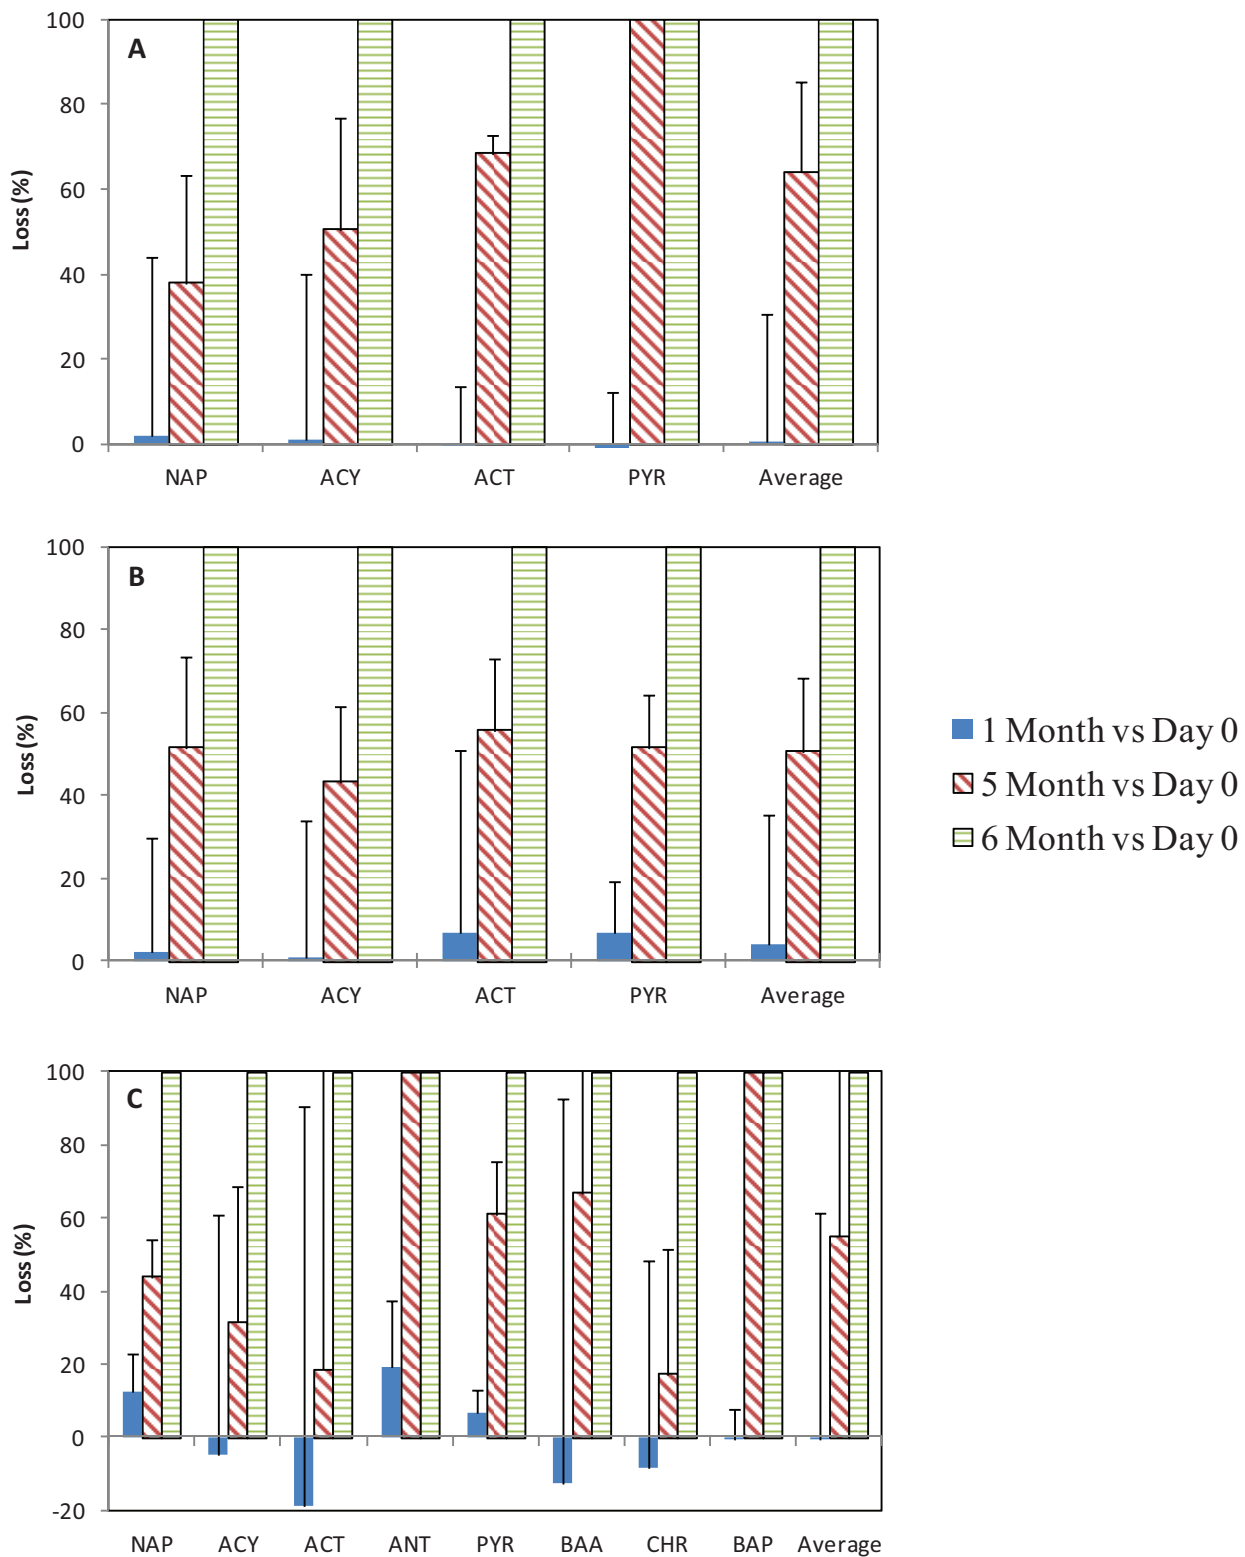

**Fig. S1.** Losses of PAHs in stored extracts compared to directly analyzed extracts. (A) Idle; (B) 1500 rpm-6 bar; (C) 2500 rpm-9 bar. Error bars show 1 SD.

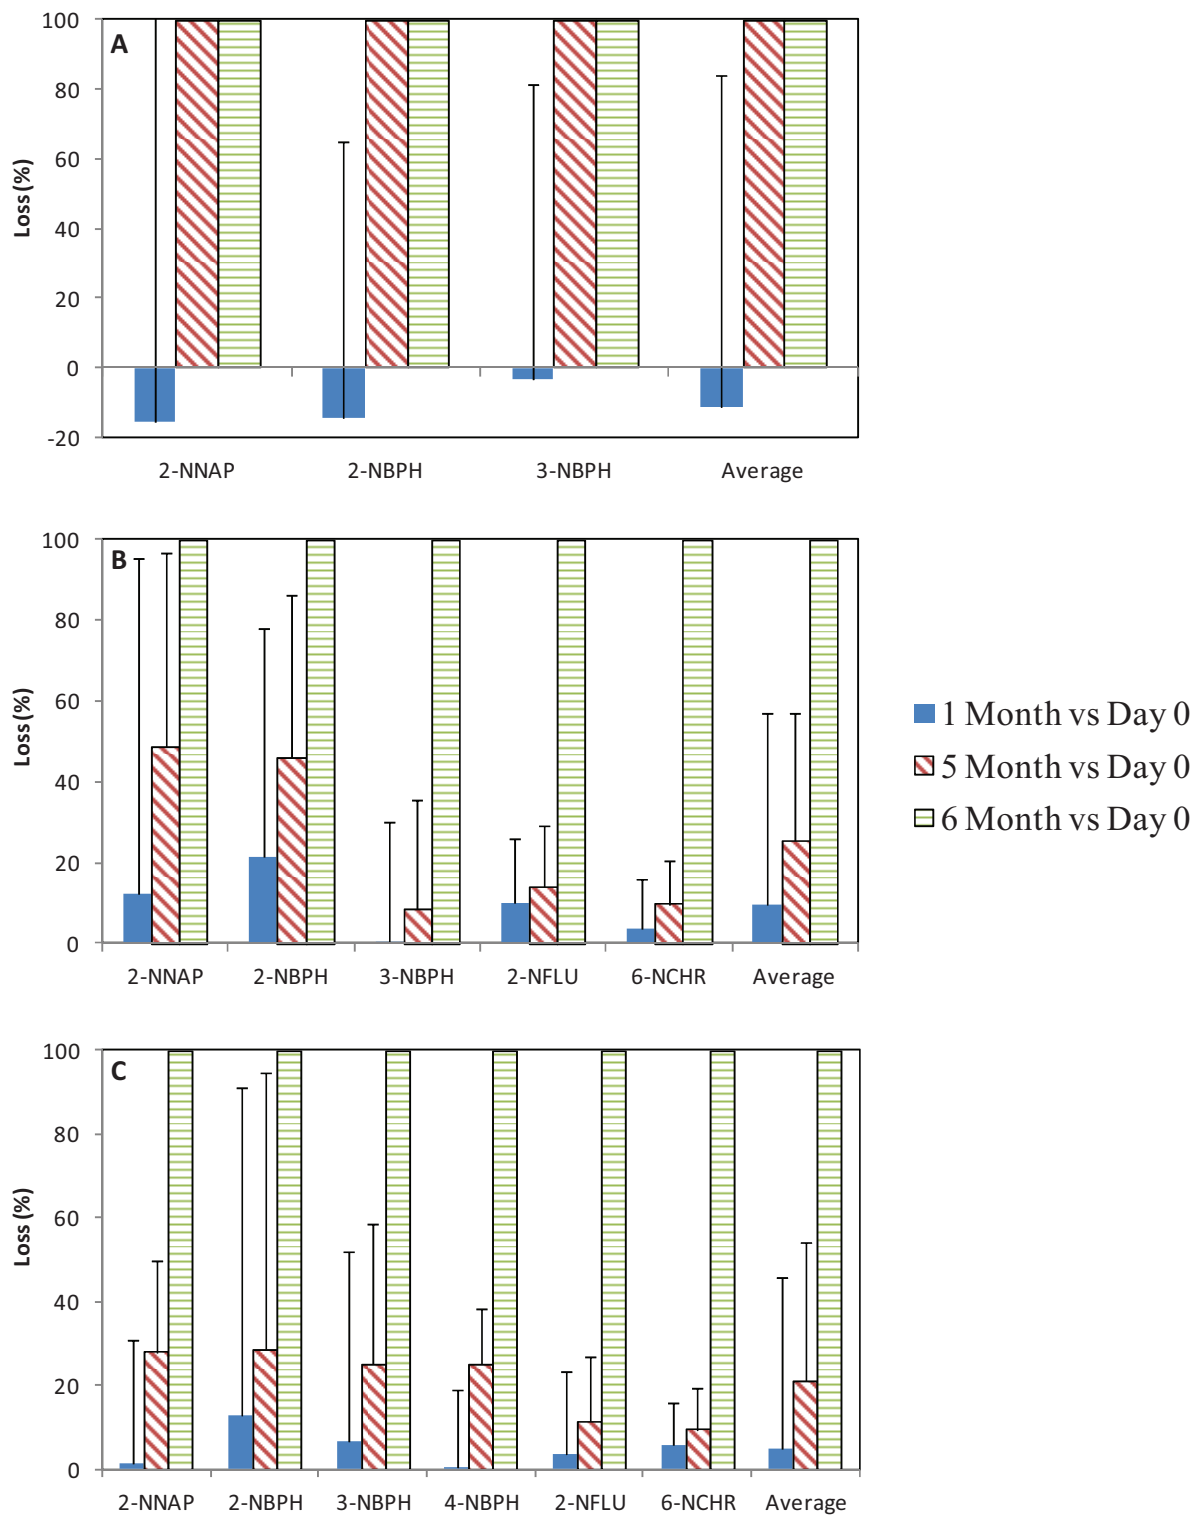

**Fig. S2.** Losses of NPAHs in stored extracts compared to directly analyzed extracts. (A) Idle; (B) 1500 rpm-6 bar; (C) 2500 rpm-9 bar. Error bars show 1 SD.

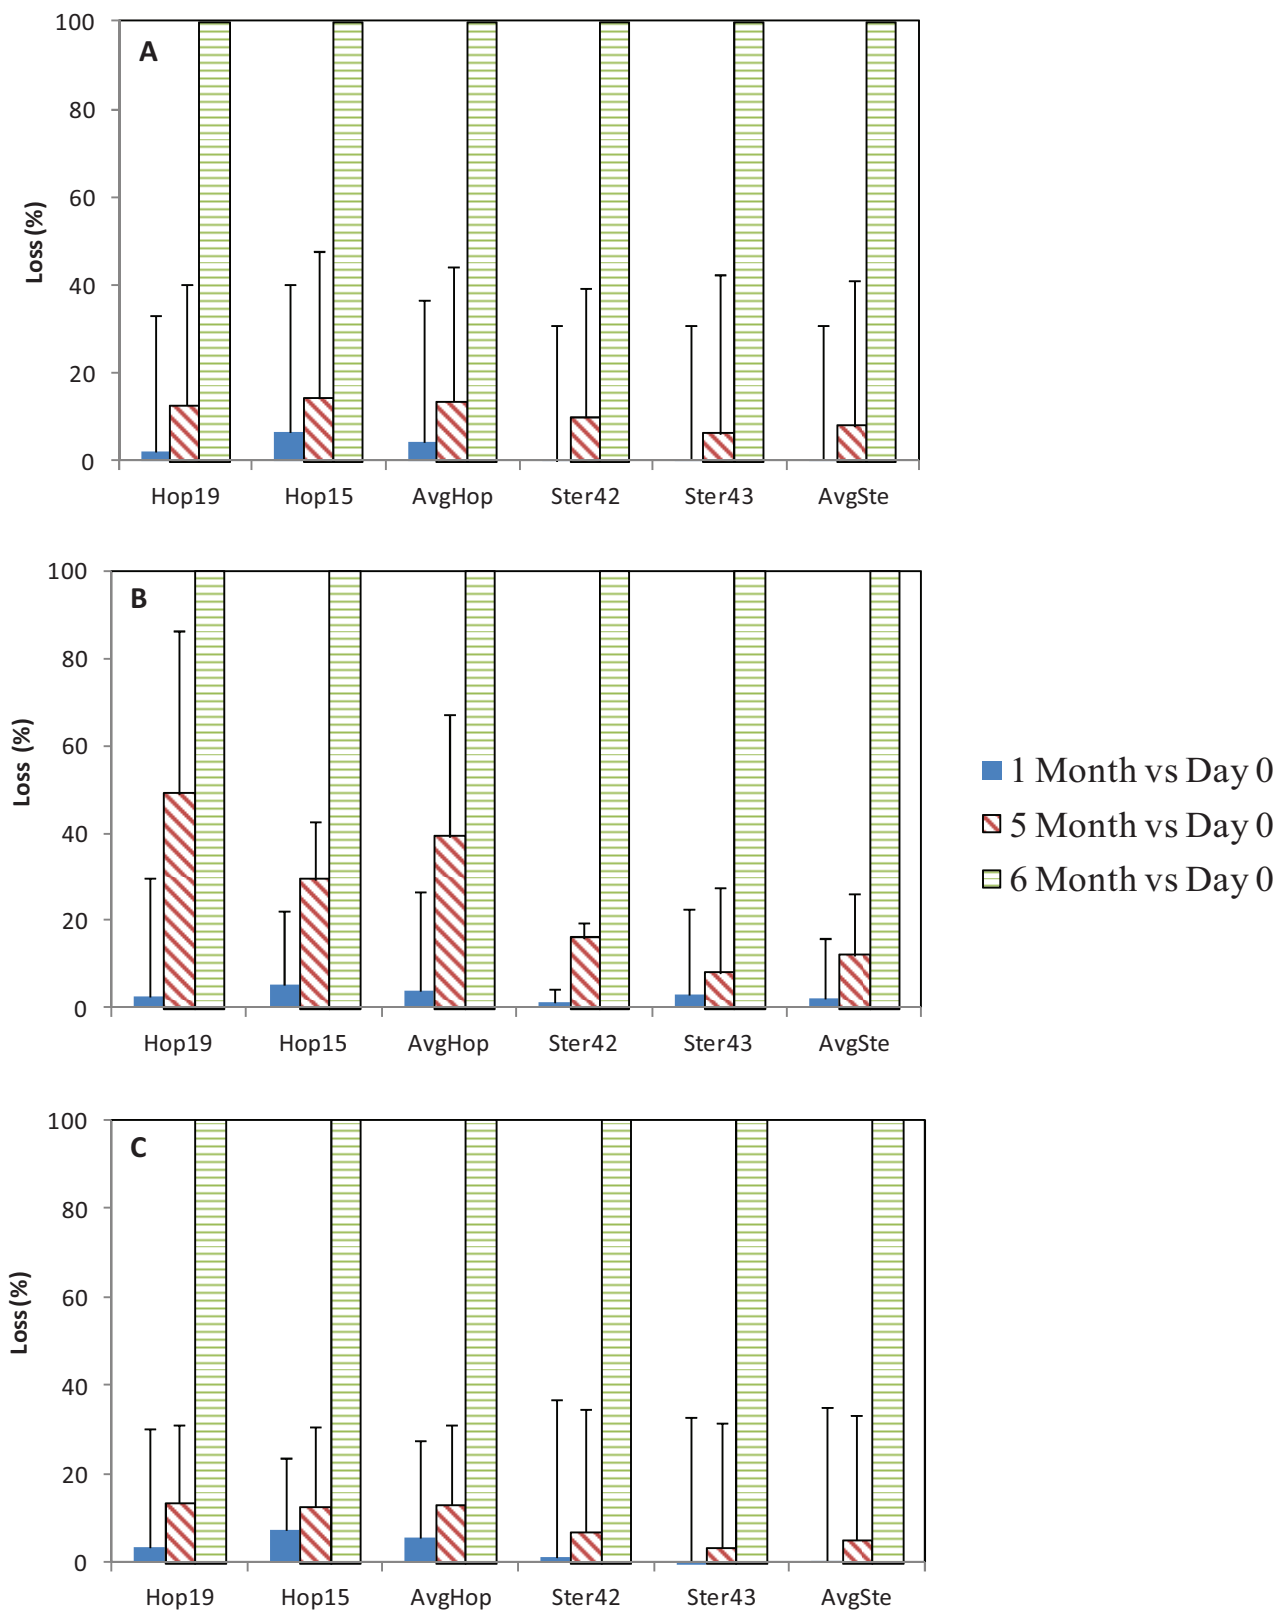

**Fig. S3.** Losses of hopanes and steranes in stored extracts compared to directly analyzed extracts. (A) Idle; (B) 1500 rpm-6 bar; (C) 2500 rpm-9 bar. Error bars show SD.
